# Supplementary material
Source: ML conference proceedings conference paper supplement (https://openaccess.thecvf.com/content/ICCV2021/html/Ren_Learning_Instance-Level_Spatial-Temporal_ICCV_2021_paper.html)
Supplement: Supplementary file 1 [file Ren_Learning_Instance-Level_Spatial-Temporal_ICCV_2021_supplemental.pdf]

# Appendix

State sets of cameras of DukeMTMC-reID are shown in Fig. 1 - Fig. 8. State sets of cameras of Market-1501 are shown in Fig. 9 - Fig. 14.

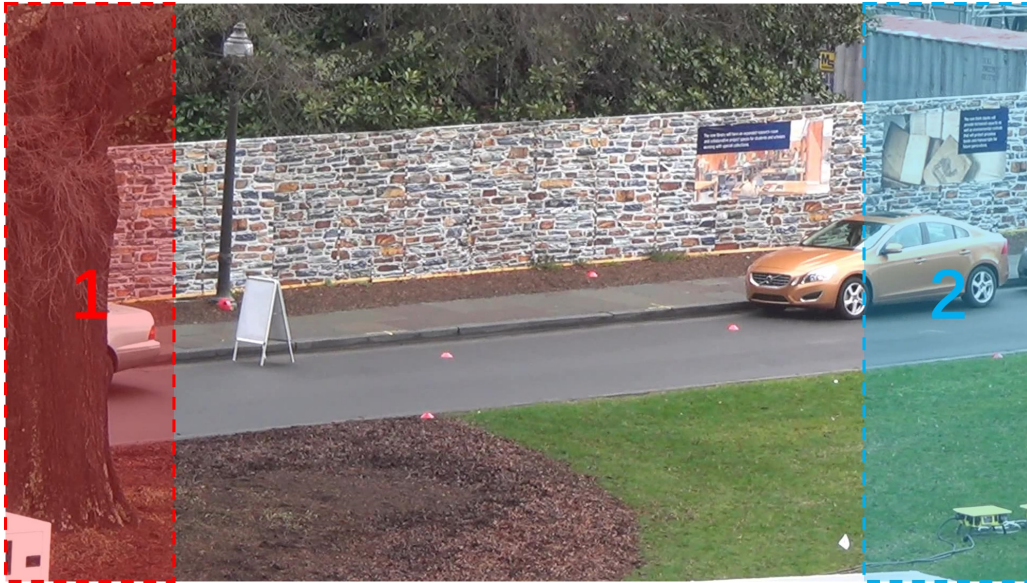

Figure 1: States of camera 1 of DukeMTMC-reID.

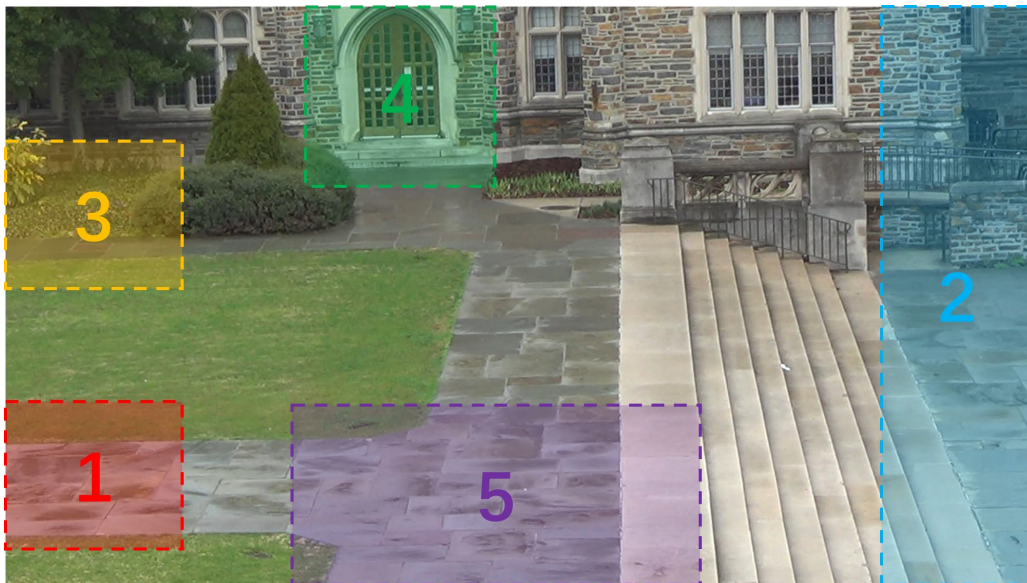

Figure 2: States of camera 2 of DukeMTMC-reID.

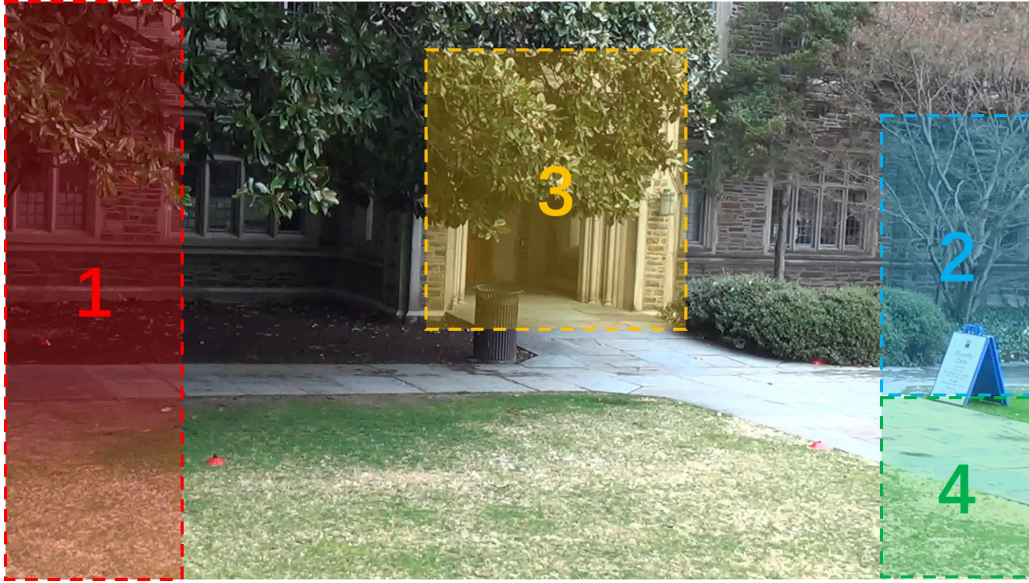

Figure 3: States of camera 3 of DukeMTMC-reID.

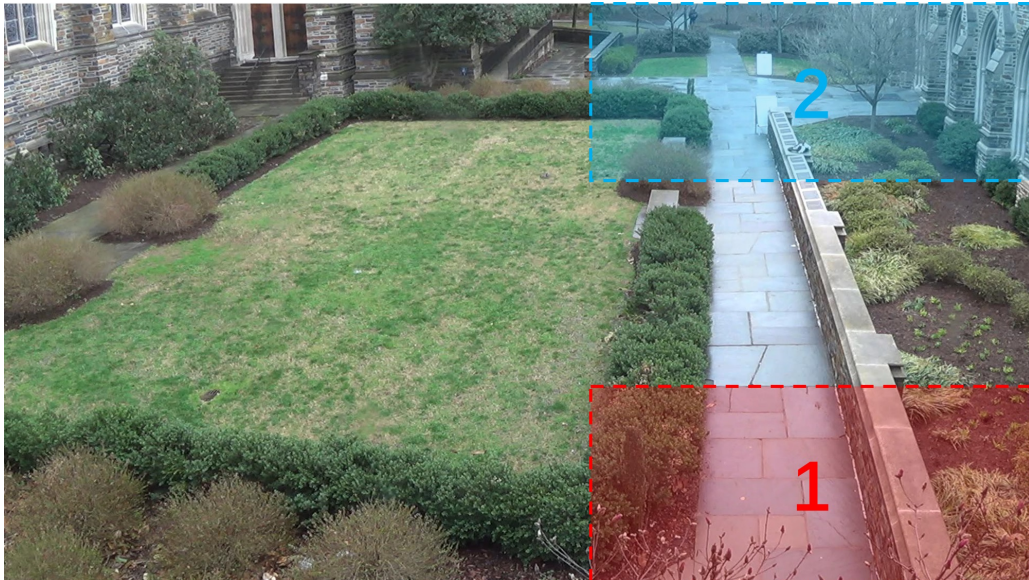

Figure 4: States of camera 4 of DukeMTMC-reID.

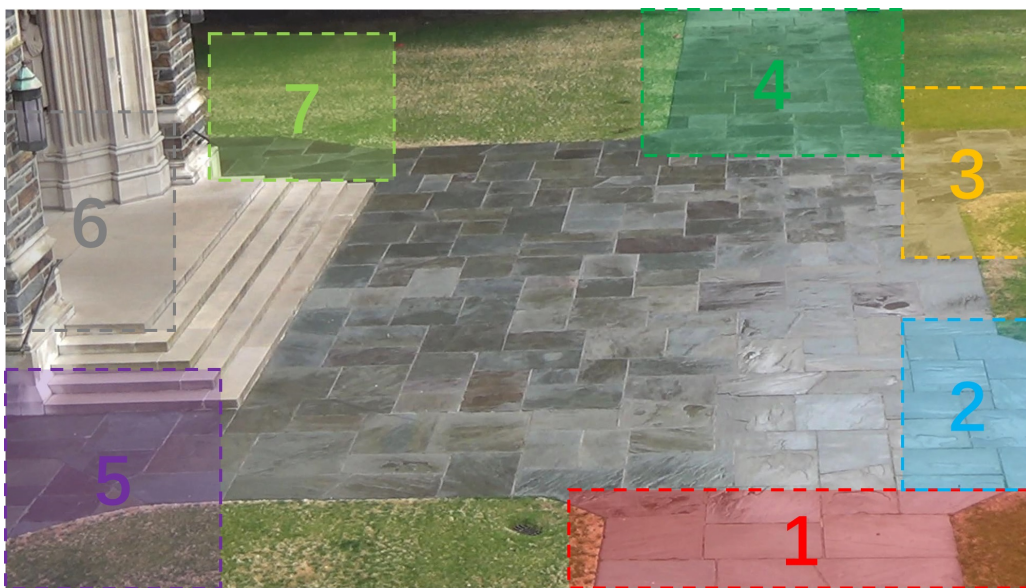

Figure 5: States of camera 5 of DukeMTMC-reID.

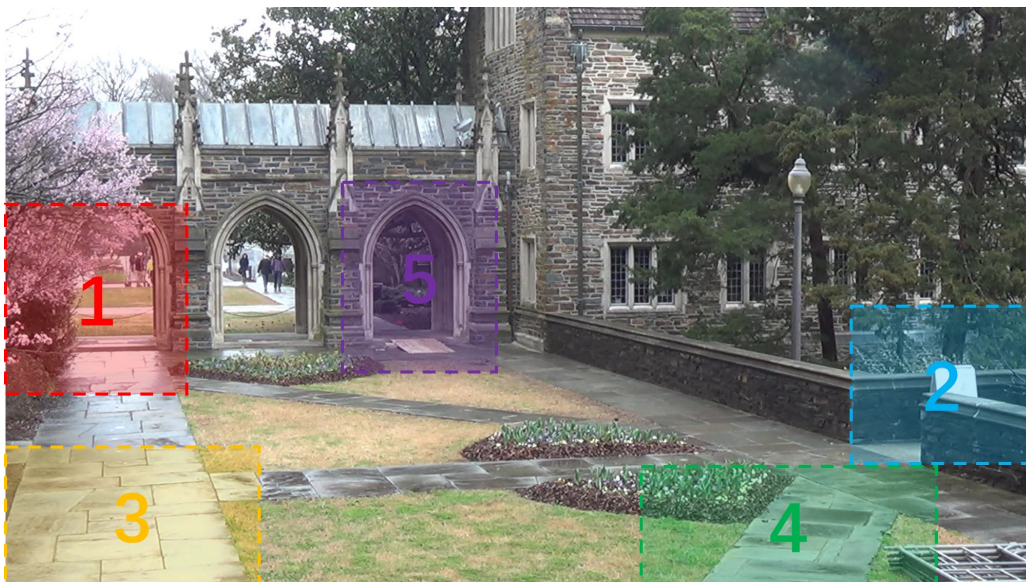

Figure 6: States of camera 6 of DukeMTMC-reID.

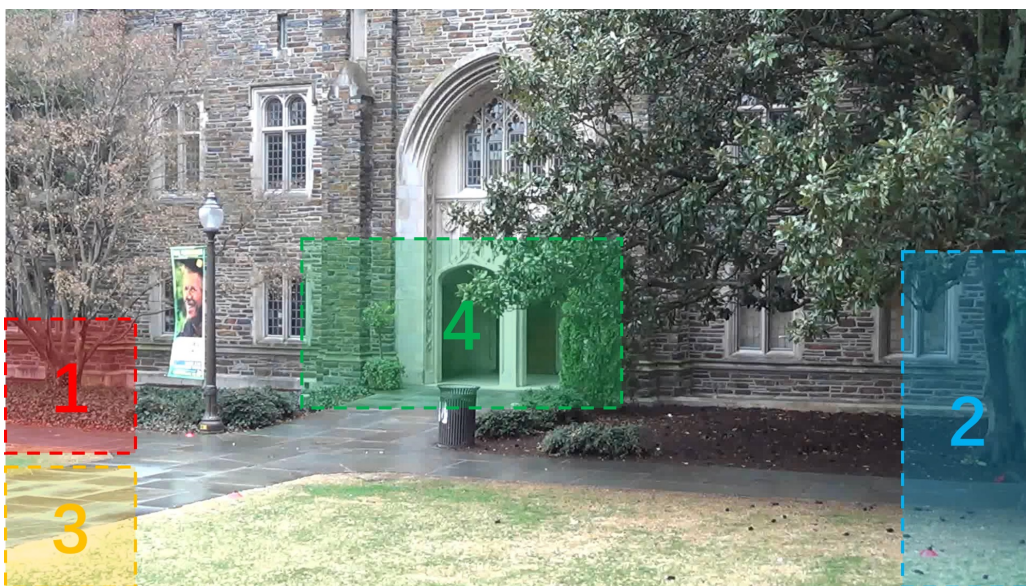

Figure 7: States of camera 7 of DukeMTMC-reID.

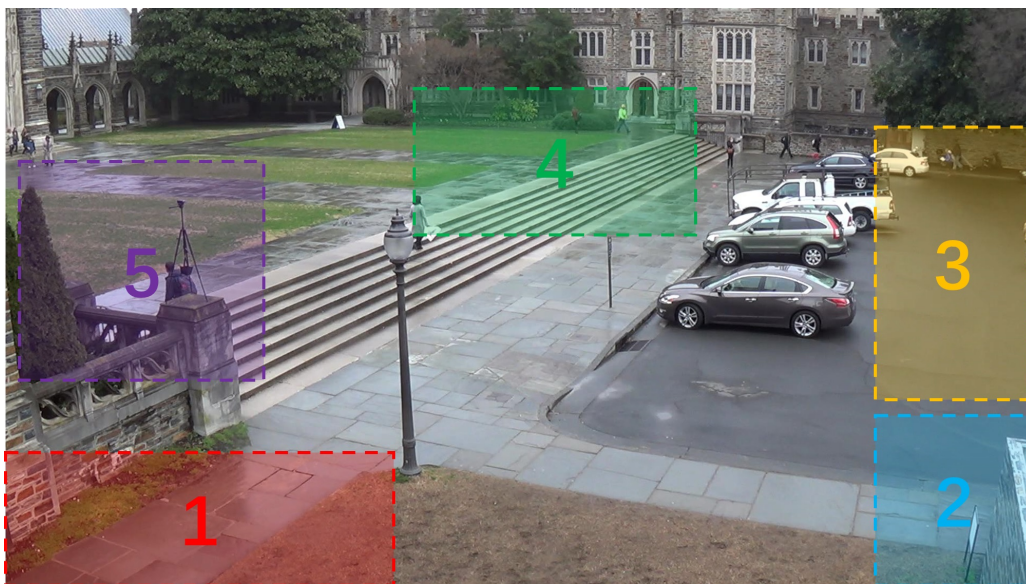

Figure 8: States of camera 8 of DukeMTMC-reID.

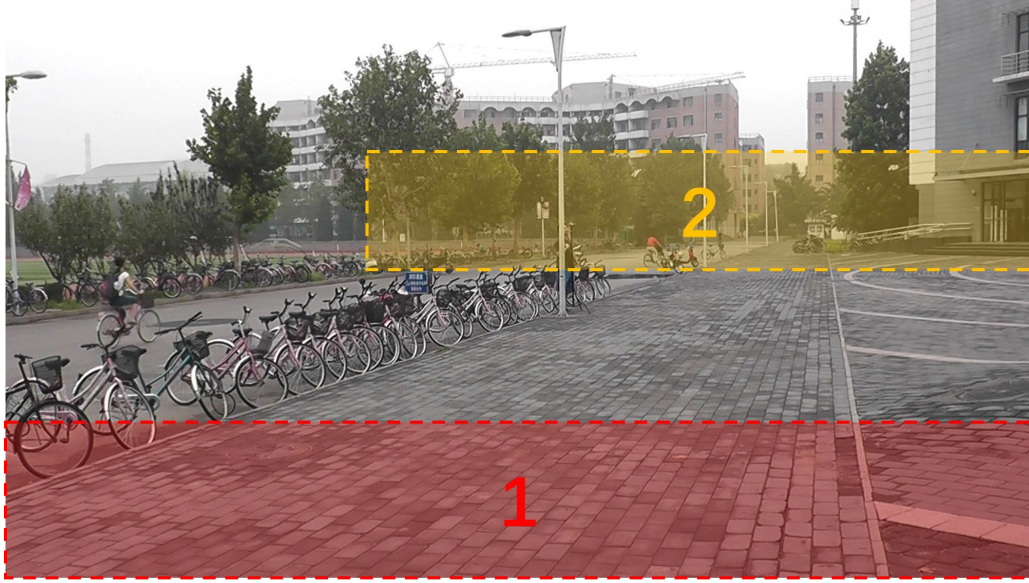

Figure 9: States of camera 1 of Market-1501.

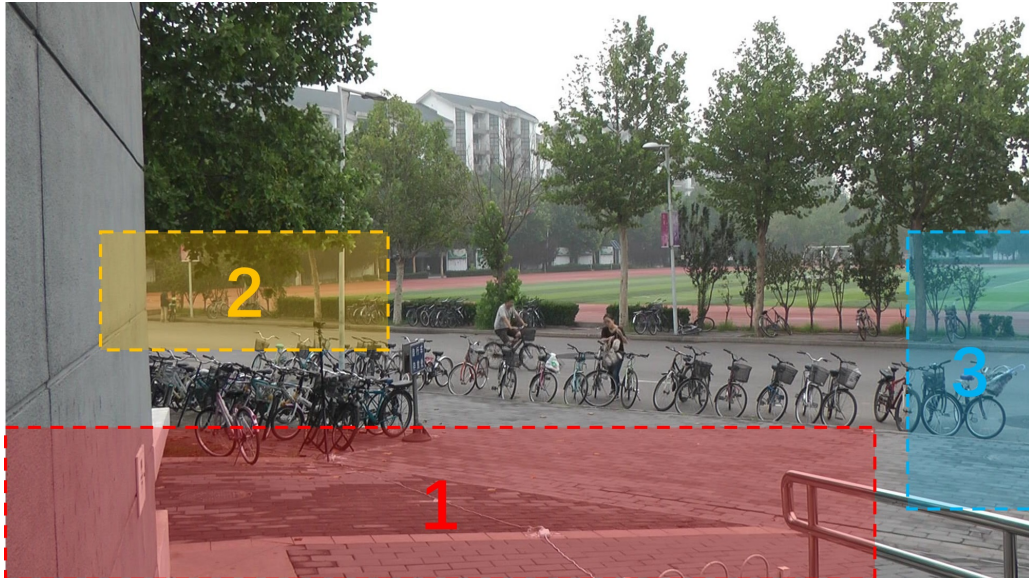

Figure 10: States of camera 2 of Market-1501.

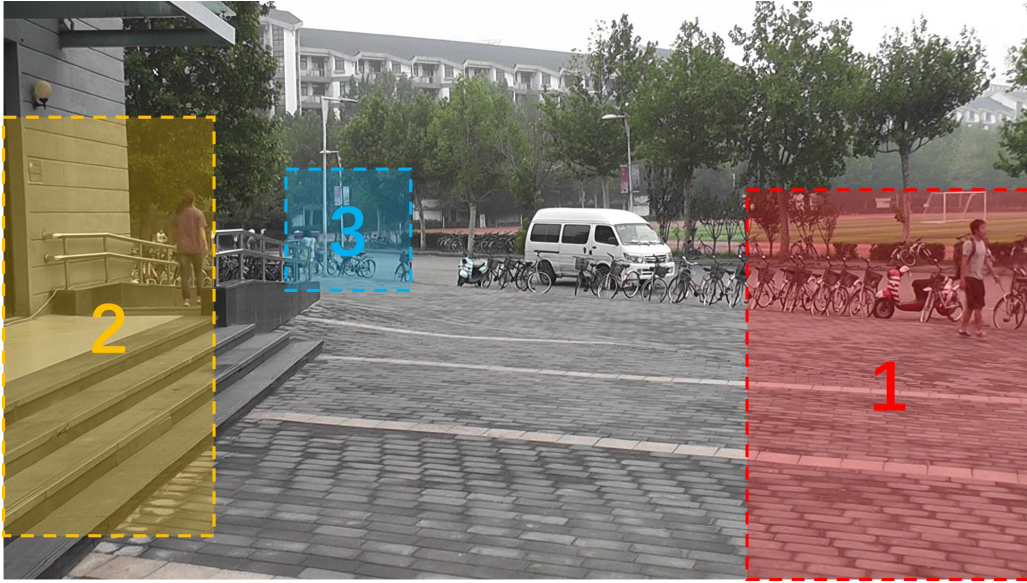

Figure 11: States of camera 3 of Market-1501.

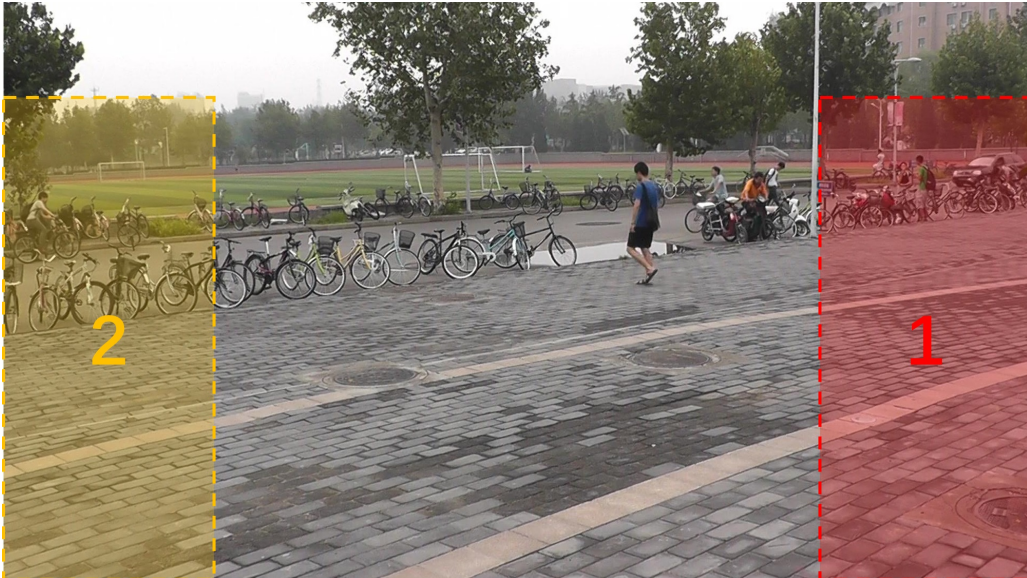

Figure 12: States of camera 4 of Market-1501.

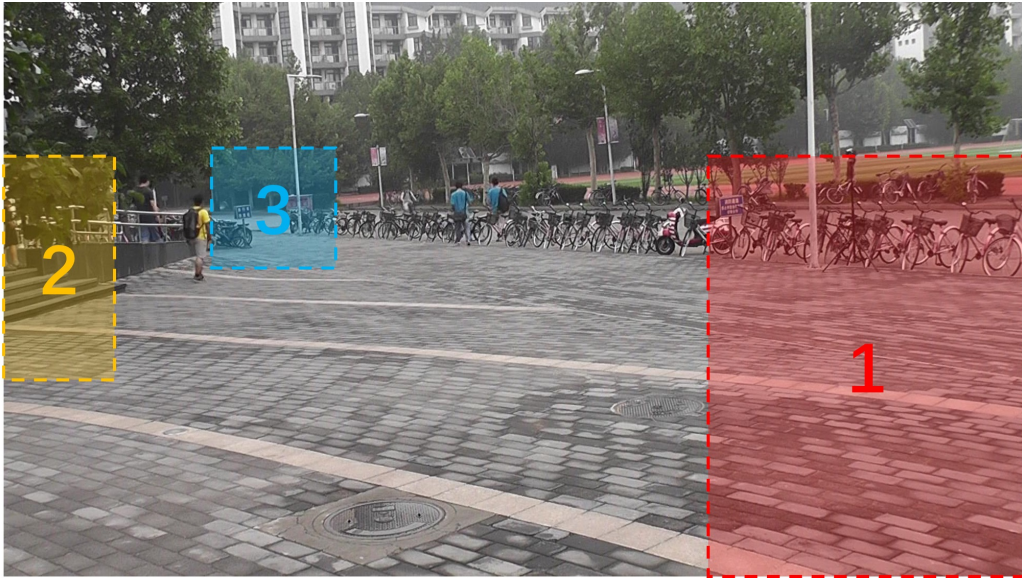

Figure 13: States of camera 5 of Market-1501.

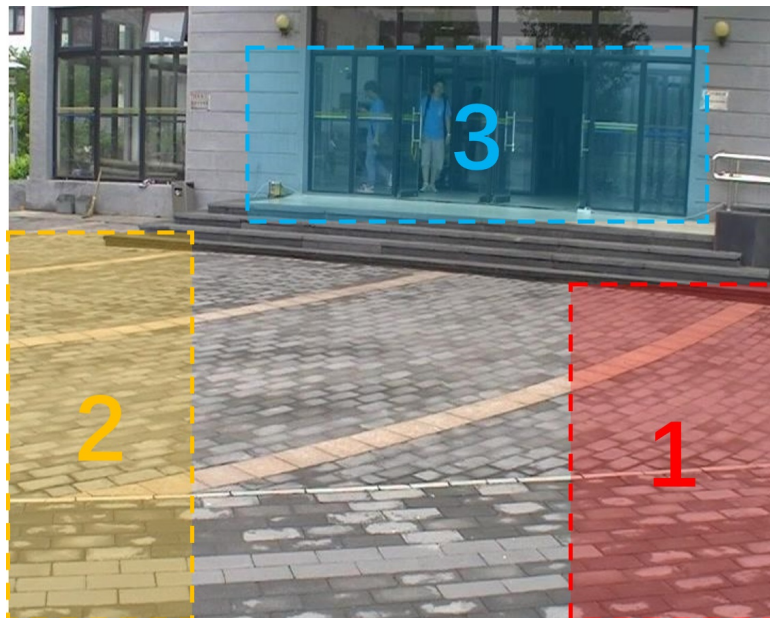

Figure 14: States of camera 6 of Market-1501.
